# Supplementary material for: Regional climate model experiments to investigate the Asian monsoon in the Late Miocene
Source: Copernicus journal article supplement (doi:10.5194/cp-7-847-2011), 2011-08-09
Supplement: Supplementary file 1 [file supplementary_materials.doc]

**Supplementary Materials**

Figure S1: Monthly evolution of the domain averaging soil water content (m) in the upper soil level (0 - 1 m) for the 10-year regional model integration.

Figure S2: The annual average evaporation (a) and effective precipitation (precipitation minus evaporation, Δ(P-E)) (b) anomalies (mm/day) between TORT and CTRL. The hatched areas show the significant anomalies with a Student’s *t*-test (*p*=0.05). The green contour denotes the extent of the present-day Tibetan Plateau ( > 3000 m). Note that the negative values of evaporation anomalies indicate increased evaporation, and vice versa.

Figure S3: Temperature (°C) anomalies of TORTPD and PDTORT to the present-day control run (CTRL). (a)(b)(c) TORTPD minus CTRL; (d)(e)(f) PDTORT minus CTRL. (a)(d) Annual, (b)(e) winter (DJF), (c)(f) summer (JJA). The hatched areas show the significant anomalies with a Student’s *t*-test (*p*=0.05). The green contour denotes the extent of the present-day Tibetan Plateau ( > 3000 m).
