# Supplementary figures and images for: Regional climate model experiments to investigate the Asian monsoon in the Late Miocene
Source: Copernicus journal article supplement (doi:10.5194/cp-7-847-2011), 2011-08-09

soil water content (m)

0.30

0.25

0.20

0.15

0

2

4

6

8

10

Year

—●— CTRL

—●— TORT

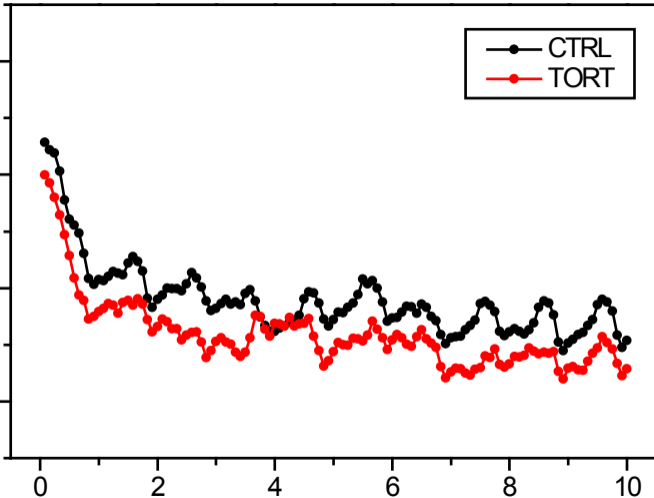

Supplement: Supplementary file 1 [file Figure_S1.pdf › Figure_S1.pdf]

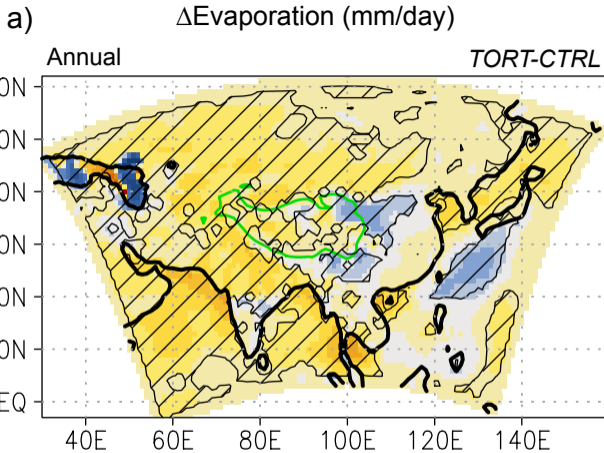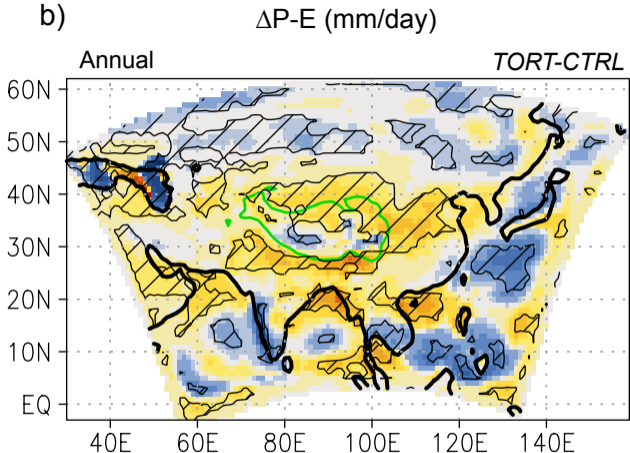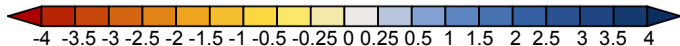

Supplement: Supplementary file 2 [file Figure_S2.pdf › Figure_S2.pdf]

$\Delta$ Temperature ( $^{\circ}\text{C}$ )

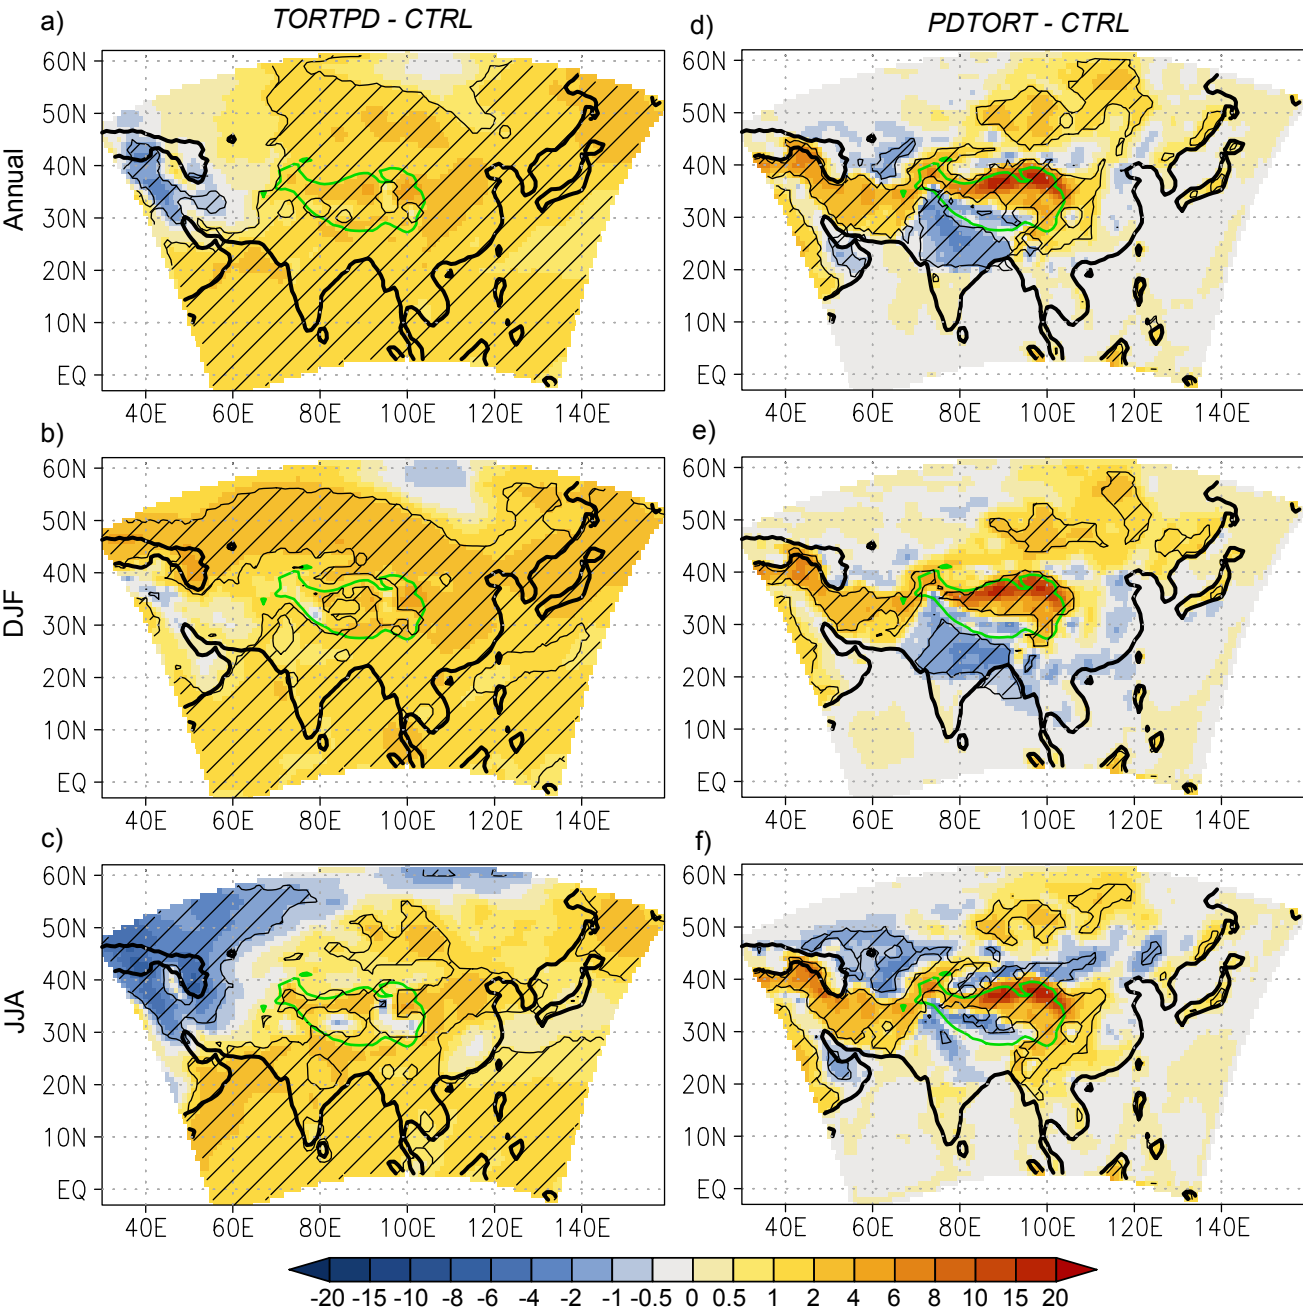

Supplement: Supplementary file 3 [file Figure_S3.pdf › Figure_S3.pdf]
